# Supplementary material for: Catalyst-assisted electrochemical deposition of graphene decorated polypyrrole nanoparticles film for high-performance supercapacitor
Source: Royal Society of Chemistry journal article supplement (doi:10.1039/c4ra09234a), 2014-10-14
Supplement: c4ra09234a1.pdf [file c4ra09234a1.pdf]

**Catalyst-assisted electrochemical deposition of graphene decorated polypyrrole nanoparticles film for high-performance supercapacitor**

**Yee Seng Lim<sup>a</sup>, Su Pei Lim<sup>c</sup>, Hong Ngee Lim<sup>a,b\*</sup>, Nay Ming Huang<sup>c</sup>**

<sup>a</sup>Department of Chemistry, Faculty of Science, Universiti Putra Malaysia, 43400 UPM, Serdang, Selangor, Malaysia

<sup>b</sup>Functional Device Laboratory, Institute of Advanced Technology, Universiti Putra Malaysia, 43400 UPM Serdang, Selangor, Malaysia

<sup>c</sup>Low Dimensional Materials Research Centre, Department of Physics, Faculty of Science, University of Malaya, 50603 Kuala Lumpur, Malaysia

\*Corresponding author. E-mail address: janet\_limhn@yahoo.com, Tel: +60163301609.

**Electronic Supplementary Information**

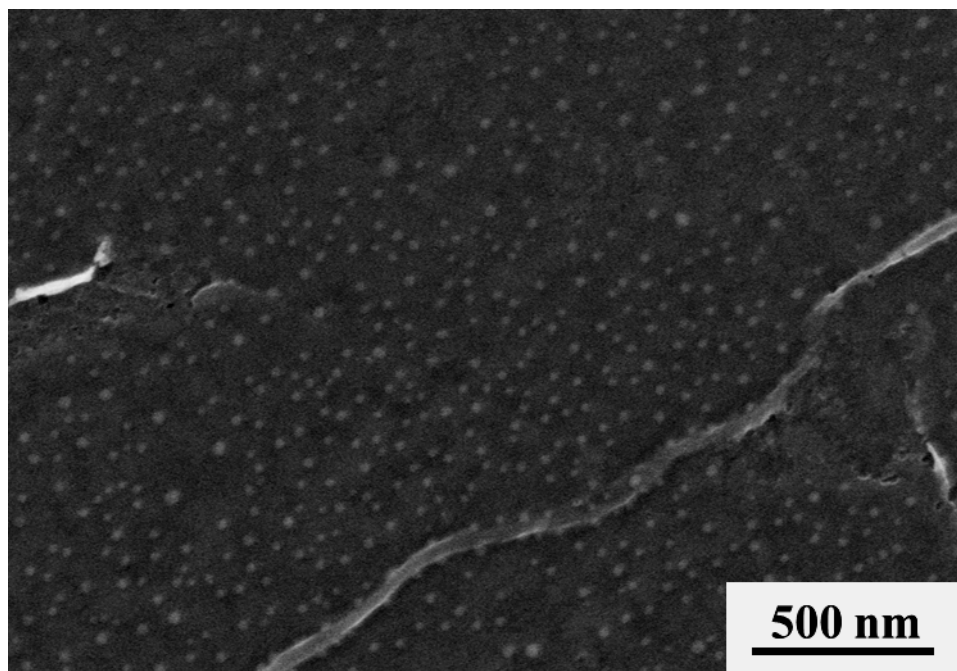

**Figure S1.** FESEM images of nano-PPy nucleation form via catalyst on graphene before proceed to electrochemical polymerization.

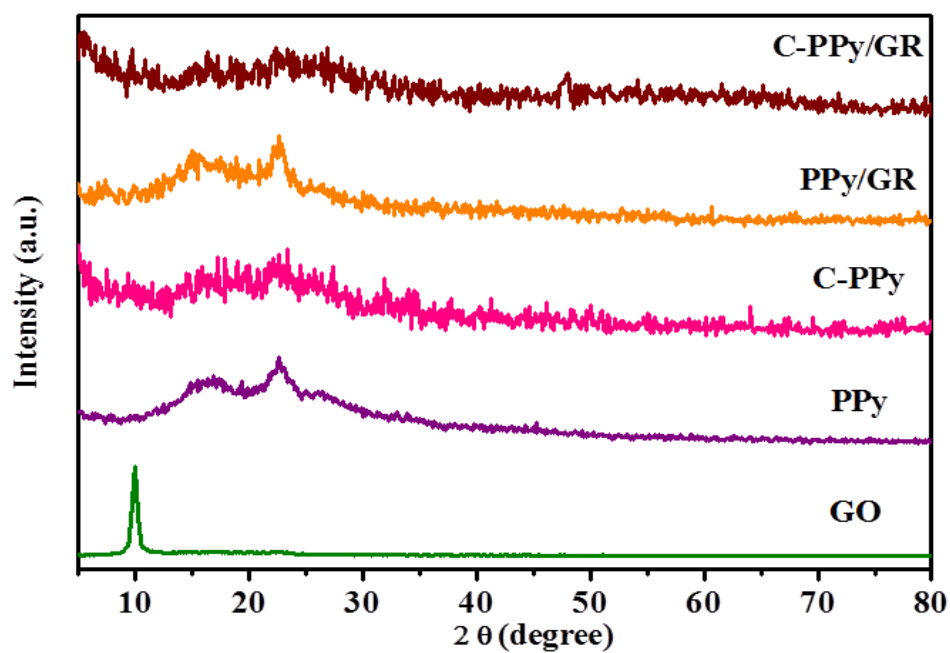

Figure S2. (a) XRD pattern of GO, PPy, PPy/GR and C-PPy/GR.

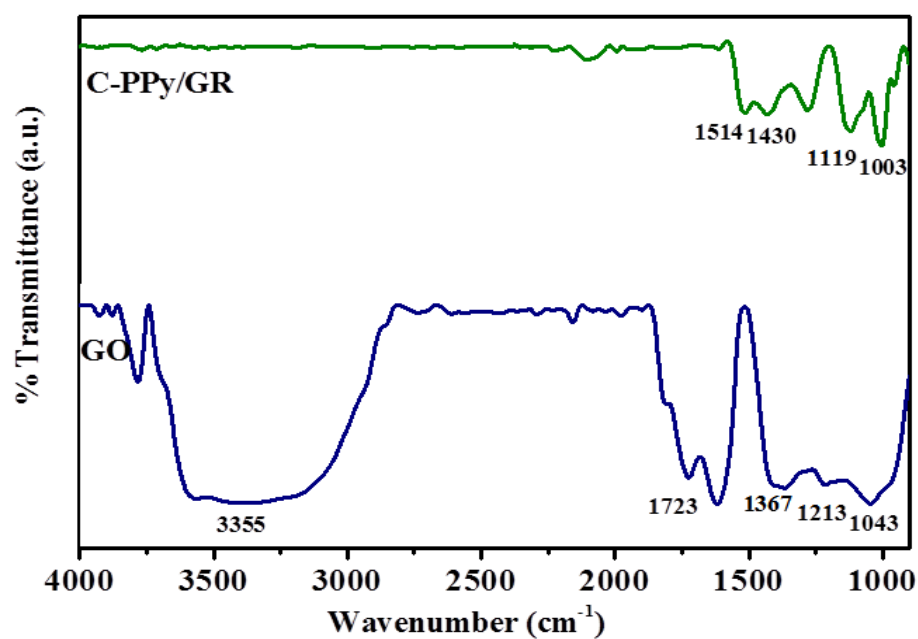

Figure S3. FT-IR spectra of GO and C-PPy/GR.
